# Supplementary material for: COVID-19-Associated Pulmonary Fungal Infection among Pediatric Cancer Patients, a Single Center Experience
Source: MDPI journal article supplement (doi:10.3390/jof8080850), 2022-08-15
Supplement: s1 [file s1]

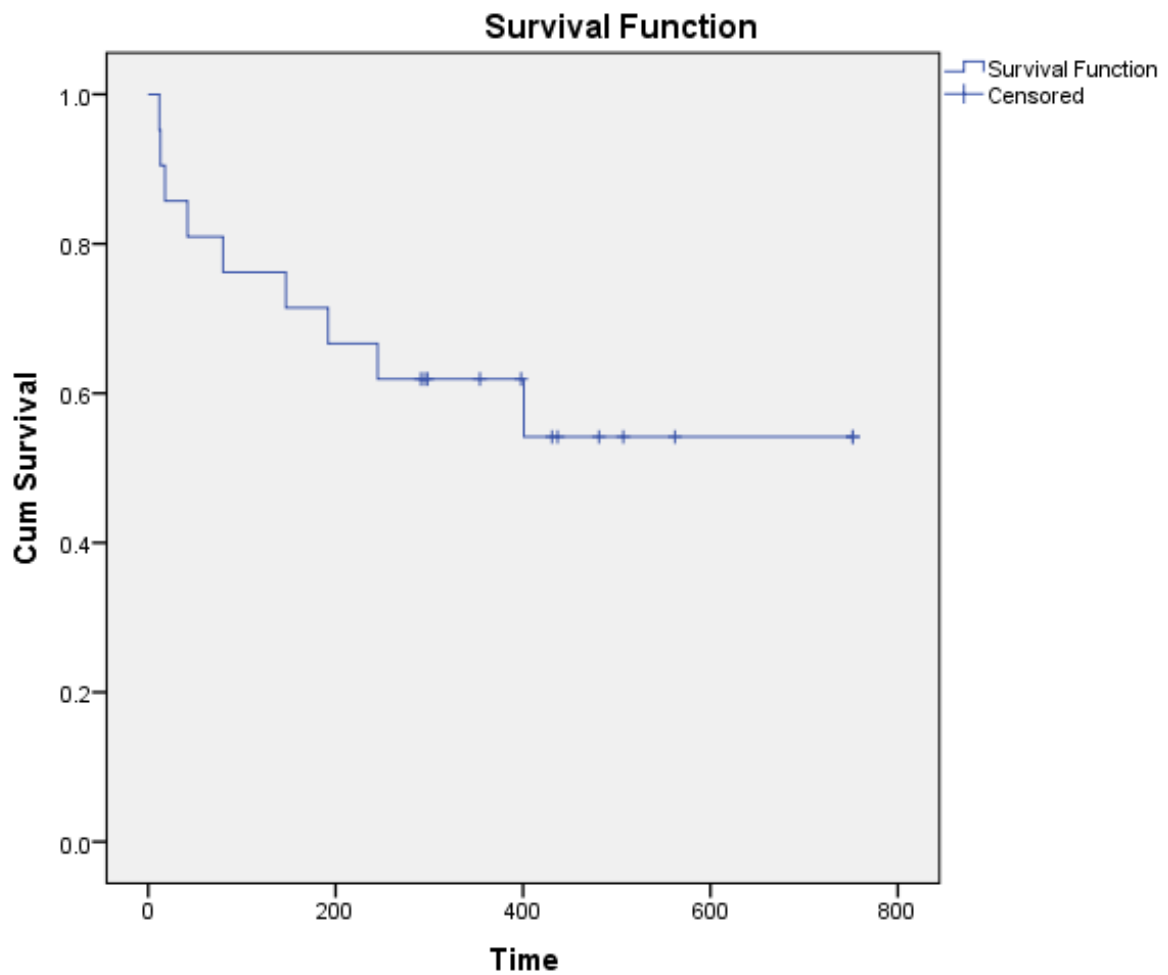

**Supplementary Figure S1:** Overall survival (OS) for pediatric cancer patients with COVID-associated pulmonary fungal infection.

**Supplementary Table S1:** correlation between mean absolute neutrophil count and COVID severity with outcome of patients with COVID- associated pulmonary fungal infection.

| Mean ANC | Category | Duration of neutropenia/day | COVID-severity | Survival |
|----------|----------|-----------------------------|----------------|----------|
| 10       | <500     | >10 days                    | Very severe    | Died *   |
| 1900     | >500     | <10 days                    | Moderate       | Alive    |
| 218      | <500     | >10 days                    | Very severe    | Died *   |
| 24       | <500     | >10 days                    | Moderate       | Died     |
| 224      | <500     | <10 days                    | Moderate       | Died     |
| 112      | <500     | >10 days                    | Severe         | Alive    |
| 69       | <500     | >10 days                    | Very severe    | Died *   |
| 1000     | >500     | <10 days                    | Moderate       | Alive    |
| 170      | <500     | <10 days                    | Moderate       | Alive    |
| 425      | <500     | <10 days                    | Moderate       | Alive    |
| 98       | <500     | <10 days                    | Moderate       | Alive    |
| 103      | <500     | <10 days                    | Moderate       | Alive    |
| 22       | <500     | >10 days                    | Moderate       | Died     |
| 300      | <500     | <10 days                    | Moderate       | Died     |
| 6600     | >500     | <10 days                    | Very severe    | Died*    |
| 324      | <500     | <10 days                    | Moderate       | Alive    |
| 500      | >500     | <10 days                    | Severe         | Alive    |
| 185      | <500     | <10 days                    | Moderate       | Alive    |
| 286      | <500     | <10 days                    | Moderate       | Alive    |
| 436      | <500     | <10 days                    | Moderate       | Alive    |
| 8200     | >500     | <10 days                    | Very severe    | Died     |

ANC: Absolute neutrophil count. \* COVID-associated fungal infection was a direct cause of death.

- 16/21 (76%) had a mean neutrophilic value of less than 500 (6 patients with a duration of more than 10 days while 10 patients had a duration less than 10 days).
- Of 8 patients who died, 6 patients had a mean neutrophilic value of less than 500.
- Of 4 patients with CCOVID-19-associated pulmonary fungal infection (CAPFI) were an attributable cause of death, 3 patients had a mean neutrophilic value of less than 500 with a more than 10 days duration.
- When stratified according to severity of COVID, there is statistically significant association between severe COVID- 19 disease and mortality.
